# Supplementary material
Source: PubMed Central journal article supplement (PMC6033648)

## Supporting Figure Legends:

### Figure S1. Serum alanine aminotransferase (ALT) in mice fed deoxycholic acid (DCA):

Male FVB/NJ (8-10 weeks) mice were fed chow supplemented with 0.3% (w/w) deoxycholic acid (DCA) for 1, 3 and 7 days or chow-alone (0 day) (n=5). Serum ALT level was measured using a spectrophotometric assay. \*\*\* $P < 0.001$  compared to 0 day.

### Figure S2. XBP1s protein expression in Huh7-Ntcp cells treated with bile acids:

Huh7-Ntcp cells were treated for 6 hours with 0-100  $\mu\text{M}$  of TDCA, TCDCA or TCA. Western blot of XBP1s protein expression in cell homogenate is shown with GAPDH used as a loading control.

### Figure S3. Expression levels of XBP1s, phosphorylated-IRE1 $\alpha$ and SHP in Huh7-Ntcp and HepG2 cells treated with FXR agonists:

Huh7-Ntcp cells (A, C) were treated with 2.5  $\mu\text{M}$  6-ECDCA, or DMSO for 0-2 hours as indicated. HepG2 cells (B, D) were treated with 2.5  $\mu\text{M}$  GW4064 or DMSO for 0-2 hours as indicated. (A, B) Western blotting was performed for phosphorylated-IRE1 $\alpha$  (p-IRE1 $\alpha$ ). Cellular p-IRE1 $\alpha$  expression is increased in Huh7-Ntcp and HepG2 cells in response to FXR-agonist treatment. XBP1s and GAPDH protein expression are also shown. (C, D) SHP mRNA expression was measured by qPCR. \* $P < 0.05$ , \*\*\* $P < 0.001$  compared to DMSO-treated cells (time 0).

### Figure S4. FXR and SHP knockdown in HepG2 cells:

HepG2 cells were transfected with FXR siRNA, SHP siRNA or scramble siRNA. FXR (A) and SHP (B) gene expression was examined using qPCR. \*\*\* $P < 0.001$  compared to scramble siRNA-transfected cells.

### Figure S5. Hepatic Xbp1u gene expression in mice treated with GW4064:

Male C57BL/6J mice were administered with either vehicle or GW4064 (150 mg/kg) and livers harvested after 16 hours. Hepatic *Xbp1u* mRNA level was measured with qPCR in vehicle- or GW4064-treated mice.

# Supporting Figure S1

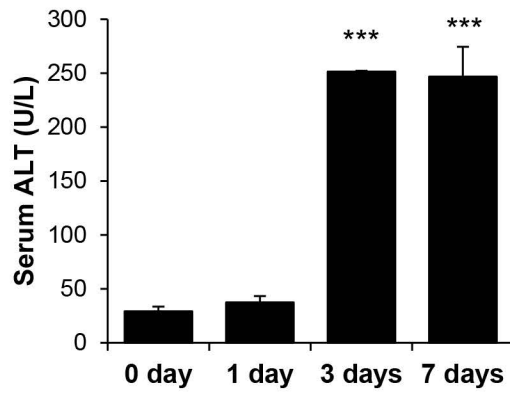

## Supporting Figure S2

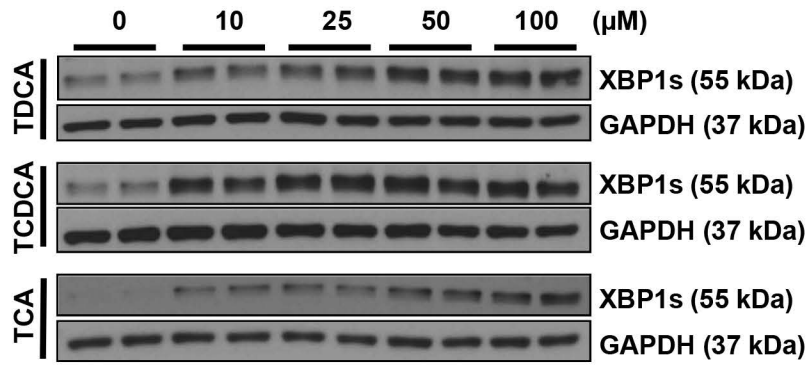

# Supporting Figure S3

**A**

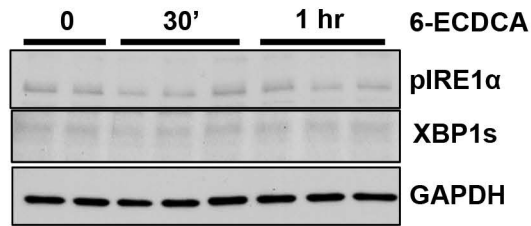

**B**

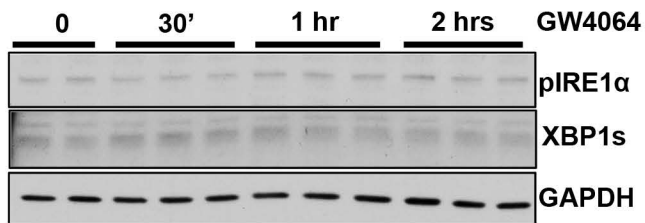

**C**

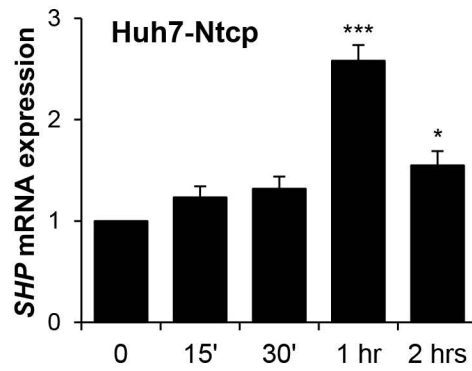

**D**

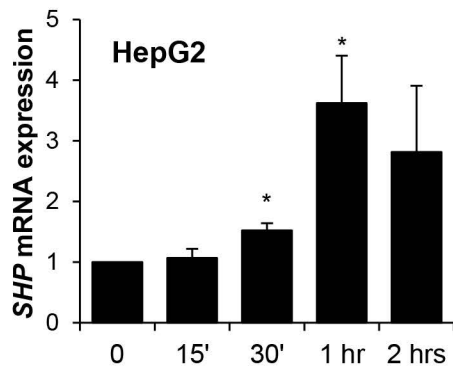

# Supporting Figure S4

**A**

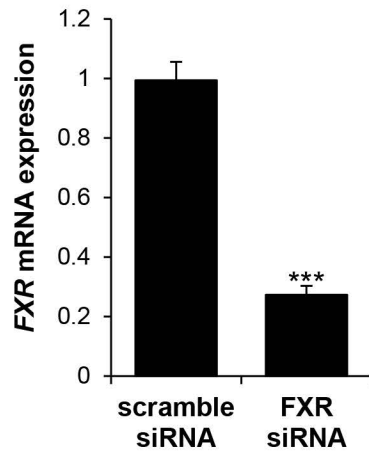

**B**

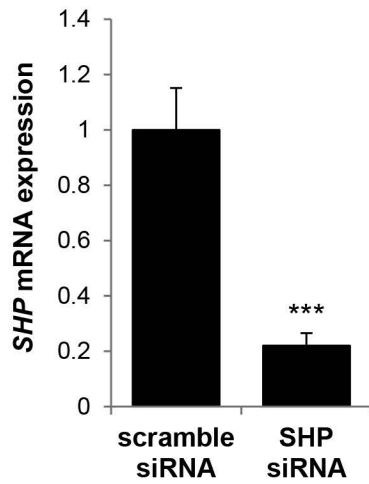

## Supporting Figure S5

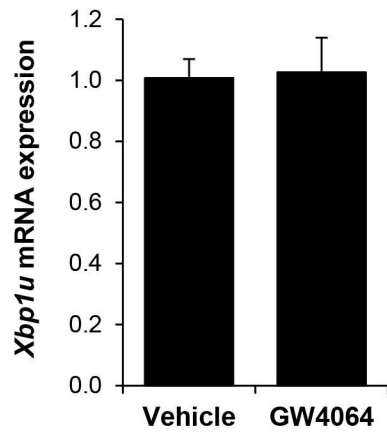

Supplement: NIHMS938135-supplement-Supp_info.pdf [file NIHMS938135-supplement-Supp_info.pdf]
